**A-316 Room C, 10/16/2000 9:00 AM - 11:00 AM (PS)**

**Efficacy of Vital-Heat Warming in Post-Anesthetic Volunteers** *Akiko Taguchi, M.D.; Cem F. Arkilic, M.D.; Arundhati Abluwalia, M.D.; Daniel I. Sessler, M.D.; Andrea Kurz, M.D., Anesthesiology, Washington University, St. Louis, MO, United States.* Vital-Heat warming did not effect overall systemic heat balance and did not increase core warming rates in post-anesthetic hypothermic subjects.

**A-317 Room C, 10/16/2000 9:00 AM - 11:00 AM (PS)**

**Clopidogrel on Bleeding and Transfusion Requirements after Coronary Bypass Graft Surgery** *Kenichi A. Tanaka, MD; Atsushi Tsuda, MD; Fania Szlam, MMS; Peter J. Olson, MD; Jerrold H. Levy, MD, Anesthesiology, Emory University School of Medicine, Atlanta, GA, United States.* Compared with CABG patients on aspirin, patients on clopidogrel had higher chest drainage and a greater need for platelet transfusion.

**A-318 Room C, 10/16/2000 9:00 AM - 11:00 AM (PS)**

**The Bispectral Index: A Guide to the Depth of Anesthesia during Spine Surgery** *Michael K. Urban, MD, PhD; Barbara Urquhart, RN, BSN, Anesthesiology, Hospital for Special Surgery, New York, NY, United States.* The Bispectral Index may be a valuable monitor of the depth of anesthesia during anesthetics in which the use of hypnotics is limited and rapid emergence may be required.

**A-319 Room C, 10/16/2000 9:00 AM - 11:00 AM (PS)**

**Prospective Study of 258 Cases of Intraoperative Monitoring the Recurrent Laryngeal Nerve (IRM) during Thyroid Surgery Via Surface EMG Performed by the Anesthesiologist** *Tobias Wolf; Thomas M. Hemmerling, MD, DEAA; Joachim Schmidt, MD; Peter Klein, MD; Klaus E. Jacobi, MD, Anesthesiology, University Erlangen, Erlangen, Bavaria, Germany.* IRM (Surface EMG) avoided nerve injury in thyroid surgery.

**A-320 Room C, 10/16/2000 9:00 AM - 11:00 AM (PS)**

**Relationship between ETCO<sub>2</sub> and Cerebral Oxygen Saturation** *Fun-Sun F. Yao, MD; Chia-Chib Tseng, MD; Juntae Yu, BS; Norman Herman, MD, PhD, Anesthesiology, Weill Cornell Medical Center, New York, NY, United States.* During hyperventilation, cerebral rSO<sub>2</sub> decreased 1.12% for each mmHg decrease in ETCO<sub>2</sub>, but increased 0.46% for each mmHg increase in ETCO<sub>2</sub>.

### Clinical Neuroscience: Hemodynamic Monitoring

**A-321 Room C, 10/16/2000 2:00 PM - 4:00 PM (PS)**

**Towards Assessing Mitral Valve Annuloplasty Ring Function and Predicting Mitral Annuloplasty Size** *John G. Augoustides, MD; Bonnie L. Milas, Anesthesia (Cardiothoracic Division), Hospital of the University of Pennsylvania, Philadelphia, PA, United States.* Mitral annuloplasty rings are crucial to successful mitral valve repair. This pilot series demonstrates that TEE images and sizes the rings.

**A-322 Room C, 10/16/2000 2:00 PM - 4:00 PM (PS)**

**Peripheral Venous Pressure Correlates Strongly with Volume during Incremental Volume Changes in Dogs** *Sanjay Bhatia, MB/BS; James Munis, MD, PhD; Leonardo Lozada, MD; David DeFily, PhD, Center for Anesthesiology Research, Cleveland Clinic Foundation, Cleveland, OH, United States.* PVP is as good an indicator of volume status as CVP.

**A-323 Room C, 10/16/2000 2:00 PM - 4:00 PM (PS)**

**Noninvasive Cardiac Output Using Partial CO<sub>2</sub> Rebreathing vs Direct Aortic Flow Measurements during off Pump Coronary Artery Bypass Grafting (OPCABG)** *Monica Botero, MD; Said Khan-sarinia, MD; David Kirby, BA; Nikolaus Gravenstein, MD; Emilio B. Lobato, MD, Anesthesiology and Cardiovascular Surgery, Univ of Florida Coll of Medicine and Veterans Affairs Medical Center, Gainesville, FL,*

**A-324 Room C, 10/16/2000 2:00 PM - 4:00 PM (PS)**

**Measurements of Carotid Blood Flow Velocity and Ventricular Cross-Sectional Area Are Suitable To Appraise Contractility** *J.A. Broscheit, MD; C.A. Greim, MD; M. Kessler, PhD; A. Mittnacht, MD; N. Roewer, MD, Anesthesiology, University Hospital, Wuerzburg, Germany.* LV elastance can be determined with Doppler-sonographic measurements of carotid artery blood flow velocity and LV cross-sectional area.

**A-325 Room C, 10/16/2000 2:00 PM - 4:00 PM (PS)**

**First Visualisation of Microvessels and Rolling Leukocytes during Cardiac Surgery in Man Using Orthogonal Polarisation Spectral Imaging** *Frank Christ, MD; Sieglinde Schaudig; Christian Schiessler, MD; Anthony G. Harris, PhD; Manfred Thiel, MD, Clinic of Anesthesiology, Ludwig Maximilians University, Munich, Germany.* CPB reduces functional capillary density & increases rolling leukocytes.

**A-326 Room C, 10/16/2000 2:00 PM - 4:00 PM (PS)**

**Photoplethysmographic Signals Recorded from Abdominal Organs** *Agnieszka J. Crerar-Gilbert, MD, FRCA; Panayiotis A. Kyriacou, MSc; Deric P. Jones, PhD; Richard M. Langford, MB BS, FRCA, Anaesthesia, Barts and The Royal London NHS Trust, London, United Kingdom.* Good quality PPG signals were obtained from normally perfused human abdominal organs suggesting the feasibility of monitoring splanchnic SpO<sub>2</sub>.

**A-327 Room C, 10/16/2000 2:00 PM - 4:00 PM (PS)**

**Validation of Cardiac Output Measured by Ultrasound Dilution In a Peripheral Artery of Anesthetized Sheep** *Robin D. Glead, BVSc; Victor V. Kislukhin, MS; Richard P. Hackett, DVM, MSc; Nikolai M. Krivitski, PhD, DSc; Alan Dobson, PhD, ScD, Clinical Sciences, Cornell University, Ithaca, NY, United States.* Cardiac output by sound velocity dilution in a peripheral artery relates closely to direct measurements from the pulmonary artery.

**A-328 Room C, 10/16/2000 2:00 PM - 4:00 PM (PS)**

**Clinical Evaluation of NICO<sub>2</sub> in ICU Patients** *Louis Guzzi, M.D.; Nicholas Drake, RRT; Dinesh G. Haryadi, Ph.D.; Kai Kuck, Ph.D.; Joseph A. Orr, Ph.D., Dept. of Anesthesiology, Florida Hospital, Orlando, FL, United States.* NICO<sub>2</sub> is a noninvasive cardiac output monitor based on partial CO<sub>2</sub> rebreathing. We evaluated NICO<sub>2</sub> in 40 ICU patients. Bias 0.28 L/m, Precision = 0.98 L/m.

**A-329 Room C, 10/16/2000 2:00 PM - 4:00 PM (PS)**

**Assessment of the Vasotrac Blood Pressure Monitor during Deliberate Hypotension** *Thomas Hartmann, M.D.; Maja Sostaric, M.D.; Claudia Grabner, M.D.; Marius Poliac, Ph.D.; Kumar Belani, M.D., Anesthesiology and Intensive Care, University of Vienna, Vienna, Austria.* This study validates usefulness of the Vasotrac BP monitor during deliberate hypotension.
